# Supplementary material for: Machine learning-assisted ammonium detection using zinc oxide/multi-walled carbon nanotube composite based impedance sensors
Source: PubMed Central journal article supplement (PMC8692315; doi:10.1038/s41598-021-03674-1), 2021-12-21
Supplement: 41598_2021_3674_MOESM1_ESM.pdf [file 41598_2021_3674_MOESM1_ESM.pdf]

## Supplementary materials

Synthesis process of F-MWCNT/ZnO-NFs composites:

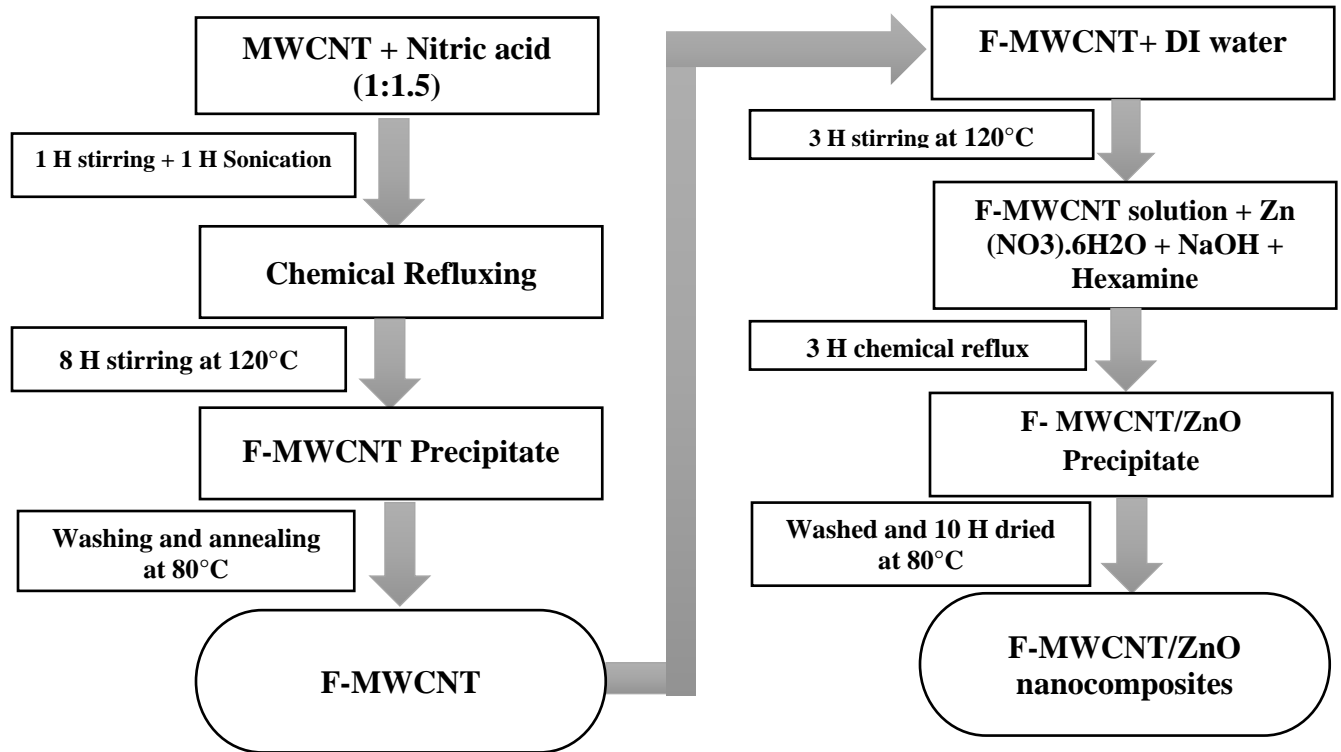

Flow chart. S1 Synthesis process of F-MWCNT/ZnO-NFs composites

**Electrochemical sesnor measurement setup:**

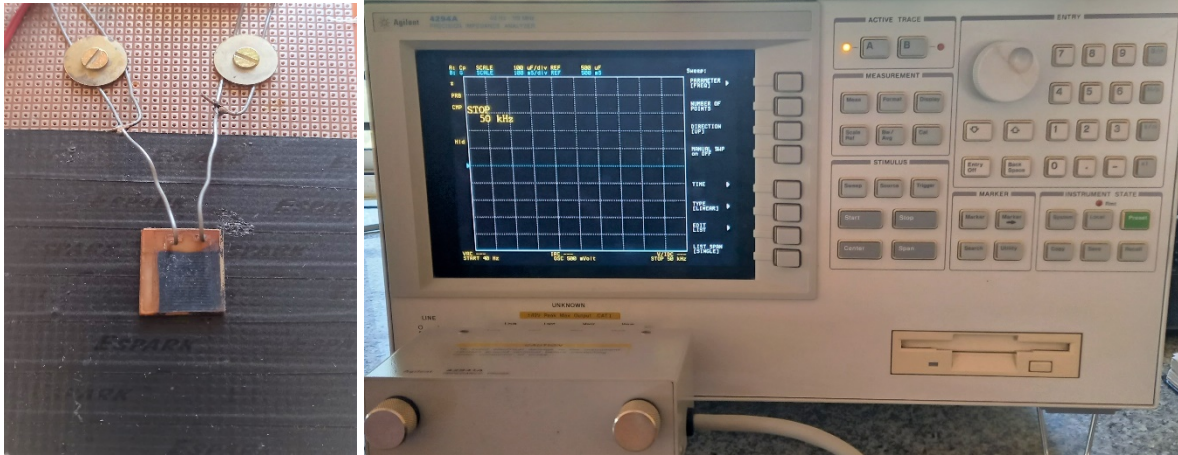

Fig. S1(a) Electrochemical measurement setup of Agilent 4294A precision impedance analyzer system

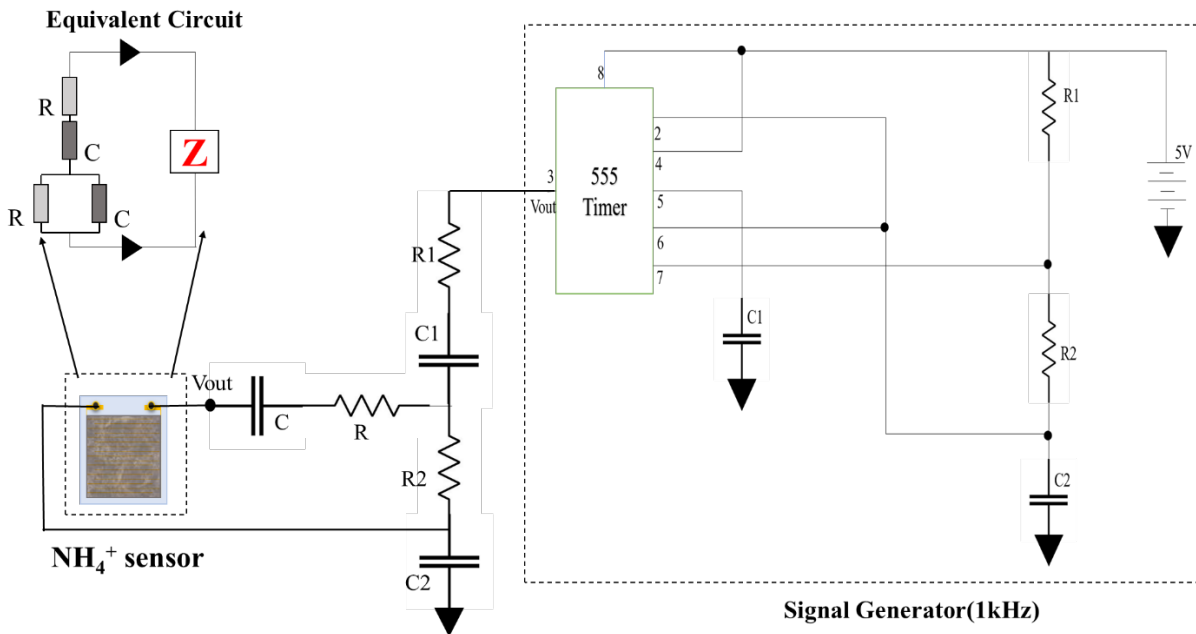

Fig. S1(b) Impedance characteristic measurement electronic circuit with 1 kHz frequency generator

## EDS characterization:

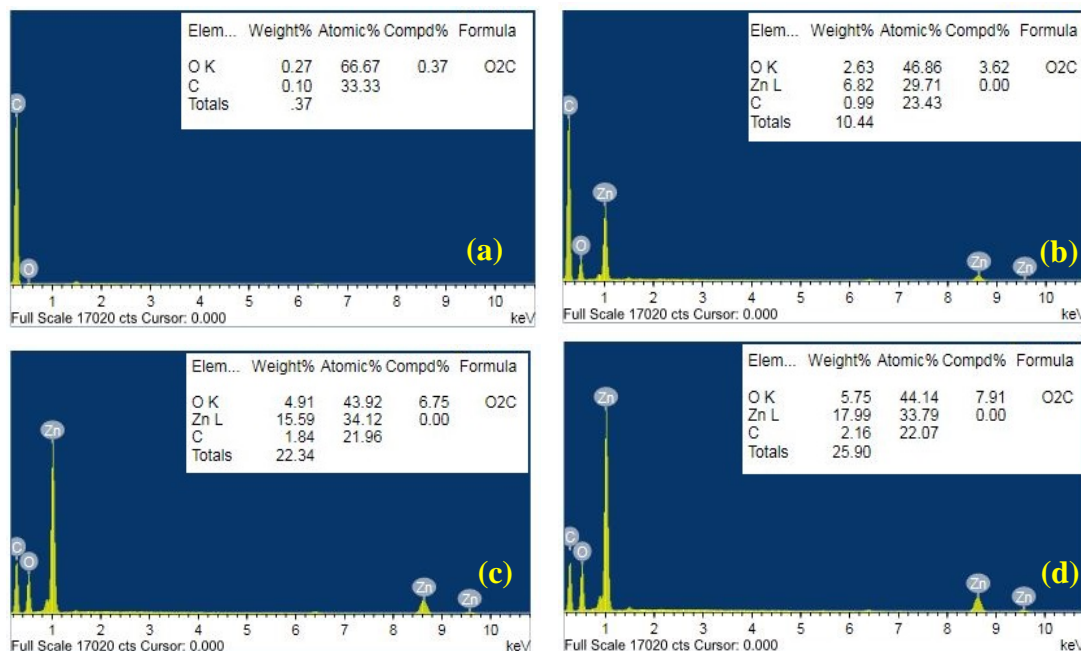

Fig. S2 EDS composition spectra for F-MWCNT (a), F-MWCNT/ ZnO-NFs composites with proportion of 1:1 (b), 1:3 (c) 1:5

Fig. S2 illustrates the EDS composition spectrum of the F-MWCNT (Fig. 4 a), F-MWCNT/ ZnO-NFs composites with proportion of 1:1 (Fig. 4 b), 1:3 (Fig. 4 c) and 1:5 (Fig. 4 d). The corresponding EDS spectrum confirms the presence of Carbon(C), Zinc (Zn) and Oxygen (O) elements in the F-MWCNT/ZnO-NFs nanocomposites and weight percentage of ZnO (6.82-17.99%) proportionally increasing with respect to the sample S1, S2 and S3. In addition, the result also indicates the higher distribution of the C and Zn in the scan area and no other impurity was detected in the chemical compositional studies.

### XRD characterization:

No other peak related to impurities was detected in the spectrum, which further confirms the synthesized materials were of high purity and matches well with the standard crystallographic data's (ZnO: JCPDS 01-076-0704, C: JCPDS No. 00-026-1080). The strong diffraction peak at the angle  $2\theta$  of  $25.58^\circ$  can be indexed as the C (002) reflection of the hexagonal graphite structure and corresponding to the MWCNT, which confirms the formation of composites and completely reduced its peaks in the F-MWCNT/ZnO-NFs nanocomposites because of ZnO-NFs embedded on the entire surface of F-MWCNT. As a function of the ZnO concentration ratio, peak intensities of F-MWCNT and ZnO varies within nanocomposite samples (S1, S2 and S3). It is clear evident that on increasing the concentration of ZnO will decreases the peak intensity of the F-MWCNTs and ZnO peaks are becoming more intense. The peaks intensity of F-MWCNT/ZnO-NFs nanocomposites (S1, S2 and S3) decreased as compared with the untainted ZnO peaks. This indicates that the crystallinity of the materials decreases on composite formation.

### Evaluation of electrochemical sensing performance of F-MWCNT/ZnO-NFs composites active layer:

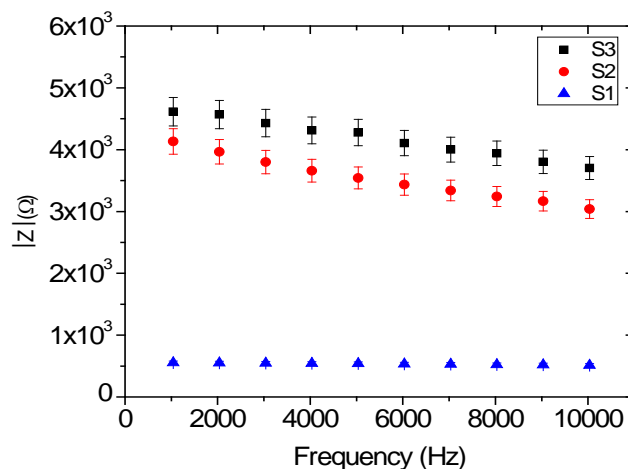

Fig. S3 Impedance magnitude versus frequency (kHz) response of the sensors (S1, S2 and S3)

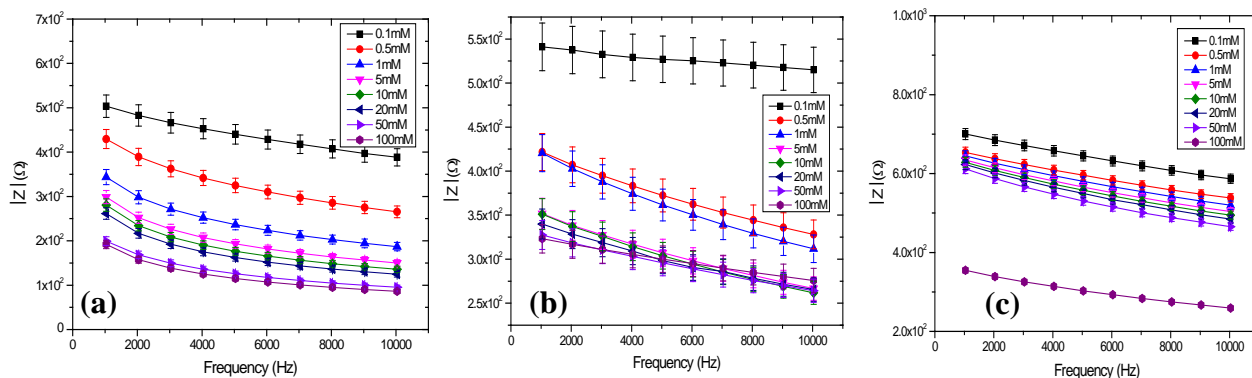

Fig. S4 Impedance magnitude ( $\Omega$ ) versus 0.1- 100 mM  $\text{NH}_4^+$  ion concentration response of the sensor S1 in the acid (a), neutral (b) and alkaline (c) sample environment conditions.

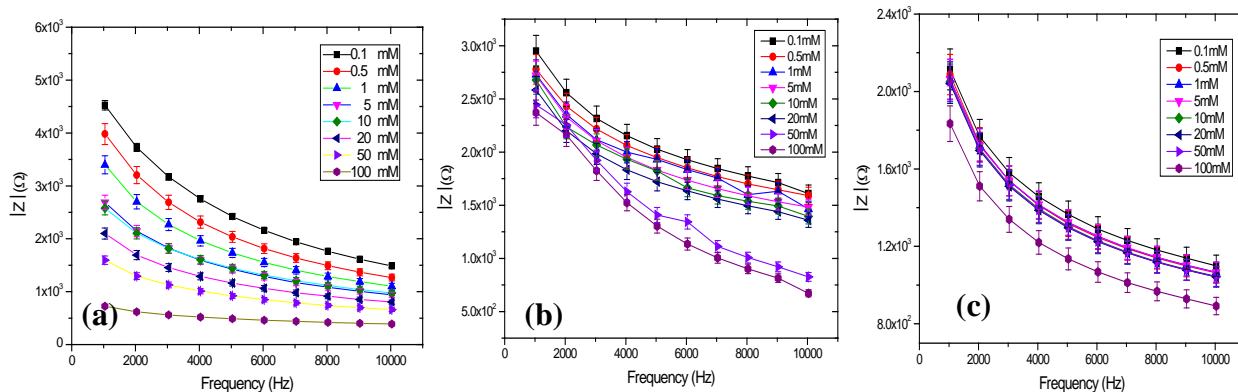

Fig. S5 Impedance magnitude ( $\Omega$ ) versus 0.1- 100 mM  $\text{NH}_4^+$  ion concentration response of the sensor S2 in the acid (a), neutral (b) and alkaline (c) sample environment conditions.

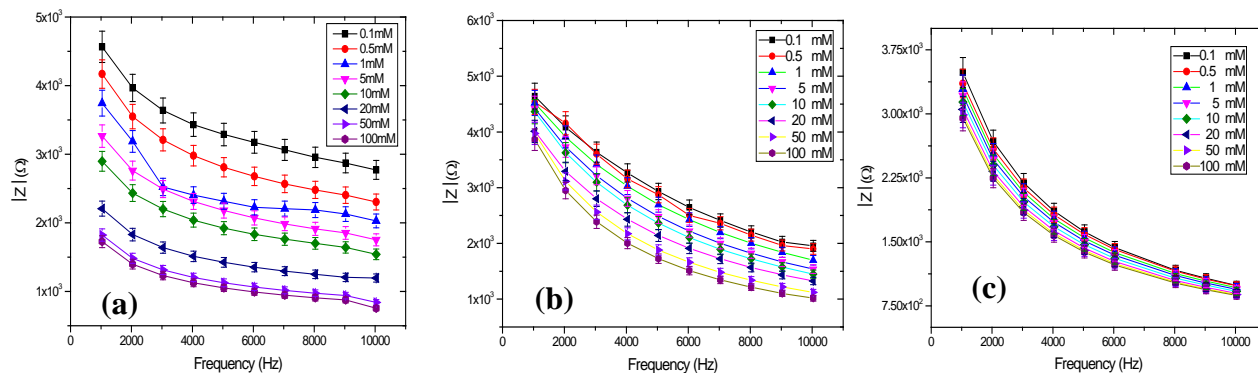

Fig. S6 Impedance magnitude ( $\Omega$ ) versus 0.1- 100 mM  $\text{NH}_4^+$  ion concentration response of the sensor S3 in the acid (a), neutral (b) and alkaline (c) sample environment conditions.

The fabricated sensors (S1, S2 and S3) sensitivity were estimated from the slope of the impedance magnitude versus  $\text{NH}_4^+$  ion characteristics response from the calibration plots shown in Fig. S5 (a, b, and c), Fig. S6 (a, b, and c) and Fig. S7 (a, b, and c) respectively.

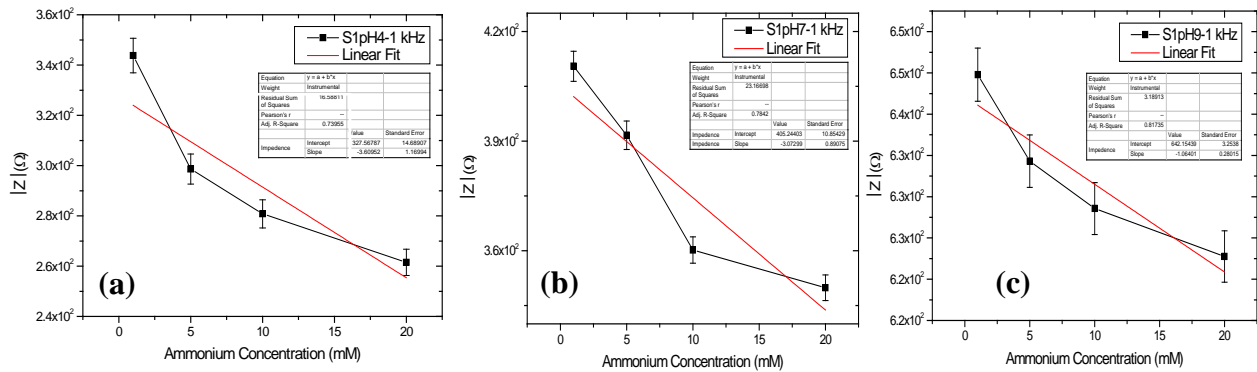

Fig. S7: Change in impedance magnitude versus  $\text{NH}_4^+$  ion concentration (1-20 mM) response of the sensor S1 in the acid (a), neutral (b) and alkaline (c) sample conditions.

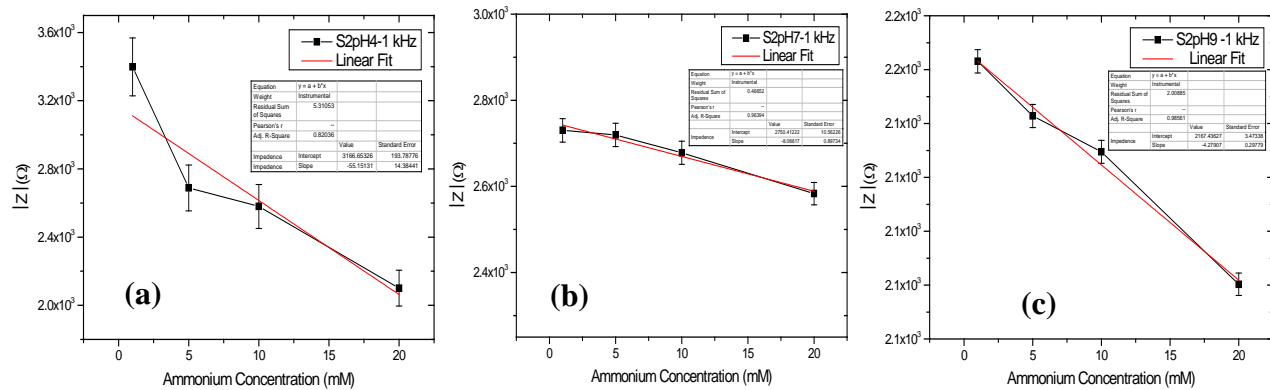

Fig. S8: Change in impedance magnitude versus  $\text{NH}_4^+$  ion concentration (1-20 mM) response of the sensor in the acid (a), neutral (b) and alkaline (c) sample conditions.

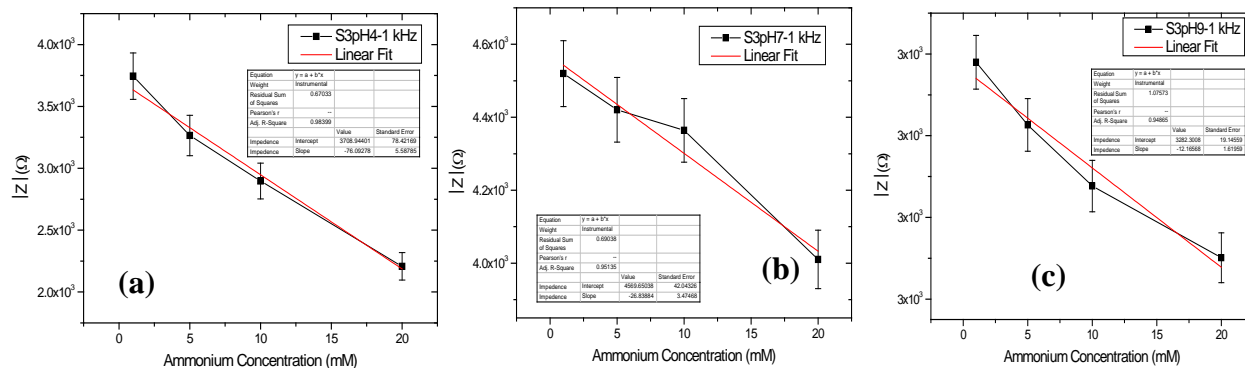

Fig. S9: Change in impedance magnitude versus  $\text{NH}_4^+$  ion concentration (1-20 mM) response of the sensor S1 in the acid (a), neutral (b) and alkaline (c) sample conditions.

The correlation coefficient ( $R^2$ ) and sensitivity of the fabricated device was calculated in the selective range and recorded in the Table S1

| $\text{NH}_4^+$ Sensor | $\text{NH}_4^+$ sample conditions | Correlation coefficient ( $R^2$ ) | Sensitivity (mM/ $\Omega$ ) |
|------------------------|-----------------------------------|-----------------------------------|-----------------------------|
| S1                     | Acid (pH=4)                       | 0.73955                           | $3.60 \pm 0.18$             |
|                        | Neutral (pH=7)                    | 0.78420                           | $3.07 \pm 0.17$             |
|                        | Alkaline (pH=9)                   | 0.81735                           | $1.06 \pm 0.05$             |
| S2                     | Acid (pH=4)                       | 0.82036                           | $55.15 \pm 2.75$            |
|                        | Neutral (pH=7)                    | 0.96394                           | $8.08 \pm 0.40$             |
|                        | Alkaline (pH=9)                   | 0.98567                           | $4.27 \pm 0.21$             |
| S3                     | Acid (pH=4)                       | 0.98399                           | $76.09 \pm 3.80$            |
|                        | Neutral (pH=7)                    | 0.95135                           | $26.18 \pm 1.30$            |
|                        | Alkaline (pH=9)                   | 0.94865                           | $12.16 \pm 0.60$            |

Table S1: Fabricated  $\text{NH}_4^+$  sensor response for selective range about 1-20 mM with acid (a), neutral (b) and alkaline (c) sample conditions

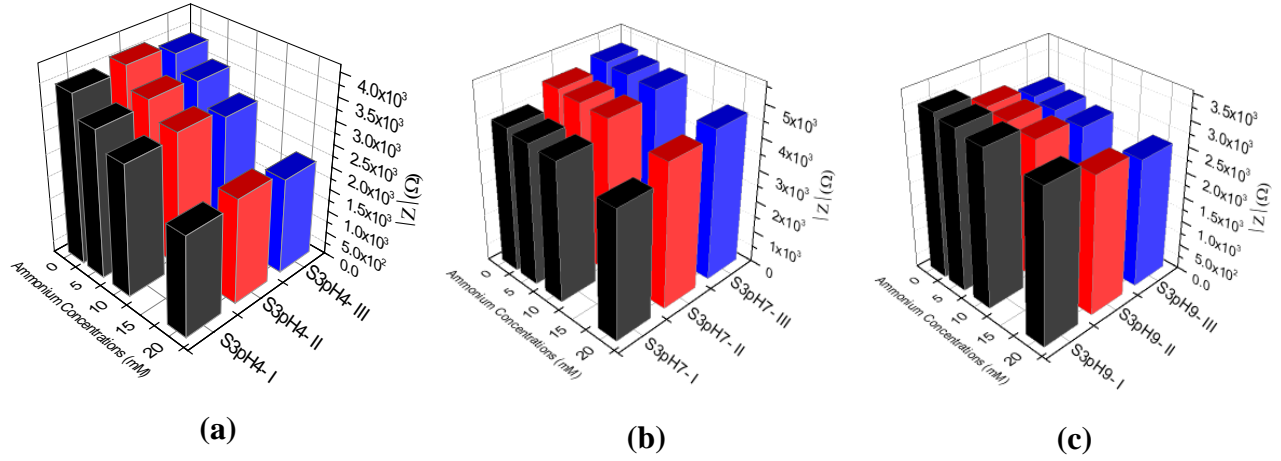

Fig. S10 Response of  $|Z_{max}|$  versus  $\text{NH}_4^+$  concentration (1 -20 mM) for three similar set of S3 devices in the acid (a), neutral (b) and alkaline (c) sample conditions

**Machine learning based target predictions:**

| DS1                 |                    |                     |                     |                     |                     |  |
|---------------------|--------------------|---------------------|---------------------|---------------------|---------------------|--|
| Scores              |                    |                     |                     |                     |                     |  |
| Model               | AUC                | CA                  | F1                  | Precision           | Recall              |  |
| kNN                 | 0.8471345951629864 | 0.43157894736842106 | 0.4087938298047534  | 0.4341037548622688  | 0.43157894736842106 |  |
| SVM                 | 0.5322029442691903 | 0.3894736842105263  | 0.2845170618854829  | 0.3059298245614035  | 0.3894736842105263  |  |
| Random Forest       | 0.9826498422712934 | 0.8315789473684211  | 0.8278736961081756  | 0.8458668730650154  | 0.8315789473684211  |  |
| Neural Network      | 0.8537066246056781 | 0.45263157894736844 | 0.4207233770701283  | 0.42360881114551085 | 0.45263157894736844 |  |
| Naive Bayes         | 0.7954784437434279 | 0.3368421052631579  | 0.32004686836247585 | 0.35930266843579534 | 0.3368421052631579  |  |
| Logistic Regression | 0.7706361724500526 | 0.3473684210526316  | 0.3079535424998155  | 0.3265350877192983  | 0.3473684210526316  |  |

Table S2: Model comparison at different sample sizes using various assessment metrics for Dataset 1

| DS2                 |                    |                     |                     |                     |                     |  |
|---------------------|--------------------|---------------------|---------------------|---------------------|---------------------|--|
| Scores              |                    |                     |                     |                     |                     |  |
| Model               | AUC                | CA                  | F1                  | Precision           | Recall              |  |
| kNN                 | 0.8488433228180863 | 0.42105263157894735 | 0.40363649508386357 | 0.48262423671361615 | 0.42105263157894735 |  |
| SVM                 | 0.4733175604626709 | 0.3684210526315789  | 0.24852872001254378 | 0.29100478468899527 | 0.3684210526315789  |  |
| Random Forest       | 0.9844900105152472 | 0.8631578947368421  | 0.8646132358760679  | 0.8789473684210526  | 0.8631578947368421  |  |
| Neural Network      | 0.8388538380651945 | 0.45263157894736844 | 0.40500552079499447 | 0.44114844563760974 | 0.45263157894736844 |  |
| Naive Bayes         | 0.7967928496319663 | 0.3684210526315789  | 0.37661130097972195 | 0.43958133971291863 | 0.3684210526315789  |  |
| Logistic Regression | 0.7237118822292324 | 0.3473684210526316  | 0.2537520367612929  | 0.20138852210351713 | 0.3473684210526316  |  |



Table S3: Model comparison at different sample sizes using various assessment metrics for Dataset 2

| DS3                 |                     |                     |                     |                     |                     |
|---------------------|---------------------|---------------------|---------------------|---------------------|---------------------|
| Scores              |                     |                     |                     |                     |                     |
| Model               | AUC                 | CA                  | F1                  | Precision           | Recall              |
| kNN                 | 0.8544952681388012  | 0.42105263157894735 | 0.3749863534136611  | 0.38696403766013276 | 0.42105263157894735 |
| SVM                 | 0.30796529968454256 | 0.3263157894736842  | 0.1798619499568594  | 0.221505376344086   | 0.3263157894736842  |
| Random Forest       | 0.987973186119874   | 0.8315789473684211  | 0.826516134224947   | 0.8516655274550011  | 0.8315789473684211  |
| Neural Network      | 0.8565983175604627  | 0.45263157894736844 | 0.3961270717720194  | 0.35678608285419433 | 0.45263157894736844 |
| Naive Bayes         | 0.7954784437434281  | 0.3684210526315789  | 0.37661130097972195 | 0.43958133971291863 | 0.3684210526315789  |
| Logistic Regression | 0.6976866456361726  | 0.35789473684210527 | 0.2726101726464703  | 0.3151503759398496  | 0.35789473684210527 |

Table S4: Model comparison at different sample sizes using various assessment metrics for Dataset 3

|        |       | Predicted |     |     |     |     |      |      |      |       |    |
|--------|-------|-----------|-----|-----|-----|-----|------|------|------|-------|----|
|        |       | 0.0       | 0.1 | 0.5 | 1.0 | 5.0 | 10.0 | 20.0 | 50.0 | 100.0 | Σ  |
| Actual | 0.0   | 2         | 0   | 1   | 0   | 0   | 0    | 0    | 0    | 0     | 3  |
|        | 0.1   | 0         | 9   | 0   | 0   | 0   | 0    | 0    | 0    | 0     | 9  |
|        | 0.5   | 0         | 1   | 7   | 0   | 0   | 0    | 0    | 1    | 0     | 9  |
|        | 1.0   | 0         | 0   | 1   | 8   | 0   | 0    | 0    | 0    | 0     | 9  |
|        | 5.0   | 0         | 0   | 0   | 1   | 6   | 2    | 0    | 0    | 0     | 9  |
|        | 10.0  | 0         | 0   | 0   | 0   | 0   | 9    | 0    | 0    | 0     | 9  |
|        | 20.0  | 0         | 0   | 1   | 0   | 0   | 0    | 7    | 1    | 0     | 9  |
|        | 50.0  | 0         | 0   | 1   | 0   | 0   | 0    | 0    | 28   | 0     | 29 |
|        | 100.0 | 0         | 0   | 0   | 0   | 0   | 0    | 1    | 2    | 6     | 9  |
| Σ      | 2     | 10        | 11  | 9   | 6   | 11  | 8    | 32   | 6    | 95    |    |

Table S5: Confusion matrix Random Forest (Showing number of instances)

|        |       | Predicted |     |     |     |     |      |      |      |       |    |
|--------|-------|-----------|-----|-----|-----|-----|------|------|------|-------|----|
|        |       | 0.0       | 0.1 | 0.5 | 1.0 | 5.0 | 10.0 | 20.0 | 50.0 | 100.0 | Σ  |
| Actual | 0.0   | 3         | 0   | 0   | 0   | 0   | 0    | 0    | 0    | 0     | 3  |
|        | 0.1   | 0         | 5   | 2   | 1   | 0   | 0    | 0    | 1    | 0     | 9  |
|        | 0.5   | 0         | 2   | 4   | 1   | 1   | 0    | 0    | 1    | 0     | 9  |
|        | 1.0   | 0         | 2   | 1   | 2   | 1   | 0    | 0    | 2    | 1     | 9  |
|        | 5.0   | 0         | 1   | 1   | 2   | 0   | 0    | 0    | 2    | 3     | 9  |
|        | 10.0  | 0         | 1   | 1   | 0   | 2   | 0    | 0    | 2    | 3     | 9  |
|        | 20.0  | 0         | 1   | 1   | 1   | 0   | 1    | 1    | 3    | 1     | 9  |
|        | 50.0  | 0         | 0   | 1   | 1   | 0   | 0    | 0    | 23   | 4     | 29 |
|        | 100.0 | 0         | 1   | 0   | 1   | 0   | 0    | 0    | 2    | 5     | 9  |
|        | Σ     | 3         | 13  | 11  | 9   | 4   | 1    | 1    | 36   | 17    | 95 |

Table S6: Confusion matrix Neutral Network (Showing number of instances)

|        |       | Predicted |     |     |     |     |      |      |      |       |    |
|--------|-------|-----------|-----|-----|-----|-----|------|------|------|-------|----|
|        |       | 0.0       | 0.1 | 0.5 | 1.0 | 5.0 | 10.0 | 20.0 | 50.0 | 100.0 | Σ  |
| Actual | 0.0   | 1         | 2   | 0   | 0   | 0   | 0    | 0    | 0    | 0     | 3  |
|        | 0.1   | 2         | 3   | 0   | 0   | 0   | 0    | 2    | 2    | 0     | 9  |
|        | 0.5   | 1         | 2   | 0   | 0   | 0   | 0    | 2    | 2    | 2     | 9  |
|        | 1.0   | 1         | 1   | 0   | 0   | 0   | 0    | 1    | 4    | 2     | 9  |
|        | 5.0   | 0         | 2   | 0   | 0   | 0   | 0    | 1    | 4    | 2     | 9  |
|        | 10.0  | 0         | 2   | 0   | 0   | 0   | 0    | 1    | 5    | 1     | 9  |
|        | 20.0  | 0         | 1   | 0   | 0   | 0   | 0    | 2    | 4    | 2     | 9  |
|        | 50.0  | 1         | 0   | 0   | 0   | 0   | 0    | 2    | 26   | 0     | 29 |
|        | 100.0 | 1         | 0   | 0   | 0   | 0   | 0    | 1    | 6    | 1     | 9  |
|        | Σ     | 7         | 13  |     |     |     |      | 12   | 53   | 10    | 95 |

Table S7: Confusion matrix Logistic Regression (Showing number of instances)

|        |       | Predicted |     |     |     |     |      |      |      |       |    |
|--------|-------|-----------|-----|-----|-----|-----|------|------|------|-------|----|
|        |       | 0.0       | 0.1 | 0.5 | 1.0 | 5.0 | 10.0 | 20.0 | 50.0 | 100.0 | Σ  |
| Actual | 0.0   | 3         | 0   | 0   | 0   | 0   | 0    | 0    | 0    | 0     | 3  |
|        | 0.1   | 0         | 5   | 1   | 0   | 1   | 0    | 2    | 0    | 0     | 9  |
|        | 0.5   | 0         | 4   | 3   | 0   | 1   | 0    | 0    | 1    | 0     | 9  |
|        | 1.0   | 0         | 3   | 4   | 2   | 0   | 0    | 0    | 0    | 0     | 9  |
|        | 5.0   | 0         | 3   | 2   | 0   | 3   | 0    | 0    | 1    | 0     | 9  |
|        | 10.0  | 0         | 2   | 3   | 1   | 1   | 1    | 0    | 1    | 0     | 9  |
|        | 20.0  | 0         | 2   | 2   | 1   | 2   | 0    | 0    | 2    | 0     | 9  |
|        | 50.0  | 0         | 2   | 1   | 0   | 1   | 0    | 0    | 22   | 3     | 29 |
|        | 100.0 | 0         | 2   | 1   | 1   | 2   | 0    | 0    | 2    | 1     | 9  |
|        | Σ     | 3         | 23  | 17  | 5   | 11  | 1    | 2    | 29   | 4     | 95 |

Table S8: Confusion matrix kNN (Showing number of instances)

|        |       | Predicted |     |     |     |     |      |      |      |       |    |
|--------|-------|-----------|-----|-----|-----|-----|------|------|------|-------|----|
|        |       | 0.0       | 0.1 | 0.5 | 1.0 | 5.0 | 10.0 | 20.0 | 50.0 | 100.0 | Σ  |
| Actual | 0.0   | 3         | 0   | 0   | 0   | 0   | 0    | 0    | 0    | 0     | 3  |
|        | 0.1   | 5         | 0   | 0   | 2   | 0   | 2    | 0    | 0    | 0     | 9  |
|        | 0.5   | 4         | 0   | 0   | 3   | 0   | 1    | 1    | 0    | 0     | 9  |
|        | 1.0   | 4         | 0   | 0   | 2   | 0   | 3    | 0    | 0    | 0     | 9  |
|        | 5.0   | 2         | 0   | 0   | 3   | 0   | 4    | 0    | 0    | 0     | 9  |
|        | 10.0  | 3         | 0   | 0   | 1   | 0   | 3    | 2    | 0    | 0     | 9  |
|        | 20.0  | 2         | 0   | 1   | 1   | 0   | 1    | 4    | 0    | 0     | 9  |
|        | 50.0  | 4         | 0   | 0   | 0   | 0   | 2    | 2    | 19   | 2     | 29 |
|        | 100.0 | 3         | 0   | 0   | 0   | 0   | 0    | 2    | 0    | 4     | 9  |
|        | Σ     | 30        |     | 1   | 12  |     | 16   | 11   | 19   | 6     | 95 |

Table S9: Confusion matrix Naïve Bayes (Showing number of instances)

|        |          | Predicted |     |     |     |     |      |      |      |       |    | $\Sigma$ |
|--------|----------|-----------|-----|-----|-----|-----|------|------|------|-------|----|----------|
|        |          | 0.0       | 0.1 | 0.5 | 1.0 | 5.0 | 10.0 | 20.0 | 50.0 | 100.0 |    |          |
| Actual | 0.0      | 1         | 1   | 1   | 0   | 0   | 0    | 0    | 0    | 0     | 0  | 3        |
|        | 0.1      | 0         | 4   | 0   | 0   | 0   | 0    | 0    | 5    | 0     | 9  |          |
|        | 0.5      | 0         | 2   | 1   | 0   | 0   | 0    | 0    | 6    | 0     | 9  |          |
|        | 1.0      | 0         | 1   | 1   | 0   | 0   | 0    | 0    | 7    | 0     | 9  |          |
|        | 5.0      | 0         | 1   | 0   | 0   | 1   | 0    | 0    | 7    | 0     | 9  |          |
|        | 10.0     | 0         | 1   | 0   | 0   | 0   | 0    | 0    | 8    | 0     | 9  |          |
|        | 20.0     | 0         | 0   | 1   | 0   | 0   | 0    | 0    | 8    | 0     | 9  |          |
|        | 50.0     | 0         | 0   | 1   | 0   | 0   | 0    | 0    | 28   | 0     | 29 |          |
|        | 100.0    | 0         | 0   | 1   | 0   | 0   | 0    | 0    | 8    | 0     | 9  |          |
|        | $\Sigma$ | 1         | 10  | 6   |     | 1   |      |      | 77   |       | 95 |          |

Table S10: Confusion matrix for SVM (Showing number of instances)

**Code:**

**Input:**

Super set-(Tri)={Tr1,Tr2....Tr5} Where Tr-Training Sets(i=1 to 5)

Super set(Tei)={Te1,Te2,...Te5} Where Te-Test Sets(i=1 to 5)

**Machine Learning Algorithms :**

NB ,RF,Knn,SVM,LR,NN(MLi)

Where,

NB-Naive Bayes

RF-Random Forest

kNN-Knowledge nearest neighbor

SVM – Support vector machine

LR- Logistic Regression

NN-Neural Network

**Output:**

1, Best Approach Algorithm

2,Dominance in Feature Extraction

3,Predicted Values in best approach algorithms.

BEGIN

FETCH the datasets from source

```

PREPROCESS the training & test datasets(DSi) as Tri,Tei
    CONVERT Categorical values(Ci) into Numerical values(Ni)
FOR i=1 to 5 DO
    CHOOSE the target(Ti) variable in Tri
    CHOOSE the Original (Ori) variable in Tei
    FEED Features of (Tri) for FEATURE EXTRACTION(Fei)
    IDENTIFY the Fei values with Greater Probability to cover maximum Fei values
    CHOOSE the Higher Dominance of Fei from Tri
END FOR
FOR j=1 to 6 DO
    FEED Fej into Machine learning Algorithms(MLj)
    FIND the Predicted values(Pj) from MLj
END FOR
FOR i=1 to 5 DO
    IF Ori== Pi THEN
        Ai=0
        Ai(Accuracy)=Ai + 1
    ELSE IF Ori > Pi || Ori< Pi THEN
        Ai(Accuracy)=Ai - 1
    END IF
END FOR
FOUND ACCURACY (A1,A2....A5)
FOR i= 1 to 5 DO
    Gri=Ai
    IF Ai > Gri THEN
        Gri=Ai
    EVALUATE greater (Gri) for the best Machine Learning algorithms
    END IF
END FOR
END

```

## **INPUT/OUTPUT**

We have Training set (Tr<sub>i</sub>) and Test set (Te<sub>i</sub>) as input for five datasets. Six Machine learning algorithms were tested to predict the target concentration in Test sets, and the most suitable algorithm is identified. Dominant predictors are extracted from all the features.

## **PREPROCESSING AND HIGHER DOMINANCE**

Fetch Tr<sub>i</sub> and Te<sub>i</sub> from the source .Preprocess both datasets by converting categorical values (C<sub>i</sub>) into numerical values(N<sub>i</sub>). Target feature (T<sub>i</sub>) from training sets (Tr<sub>i</sub>) are selected. The original predicting feature (Or<sub>i</sub>) from test sets (Te<sub>i</sub>) are chosen. Predictors are extracted from the Training sets

( $Tr_i$ ) as Feature extraction ( $Fe_i$ ). Identify the  $Fe_i$  values with the highest predominance ( $Fe_i$ ) from Training sets ( $Tr_i$ ).

### **ACCURACY FINDINGS**

Feed the Higher dominance feature extracted values ( $Fe_j$ ) values into the Machine learning algorithms ( $ML_j$ ). Find the predicted values ( $P_j$ ) of all algorithms ( $ML_j$ ). Compare the accuracy of all algorithms based on Original value ( $Or_i$ ) present in Test set and Predicted values ( $P_j$ ). Evaluate and find Higher accuracy algorithms to choose the best algorithm in machine learning based the datasets collected from the source.
